# Supplementary material for: A Novel Glucagon-Related Peptide (GCRP) and Its Receptor GCRPR Account for Coevolution of Their Family Members in Vertebrates
Source: PubMed Central journal article supplement (PMC3679108; doi:10.1371/journal.pone.0065420), 2013-06-11

Supplementary Figure S2A

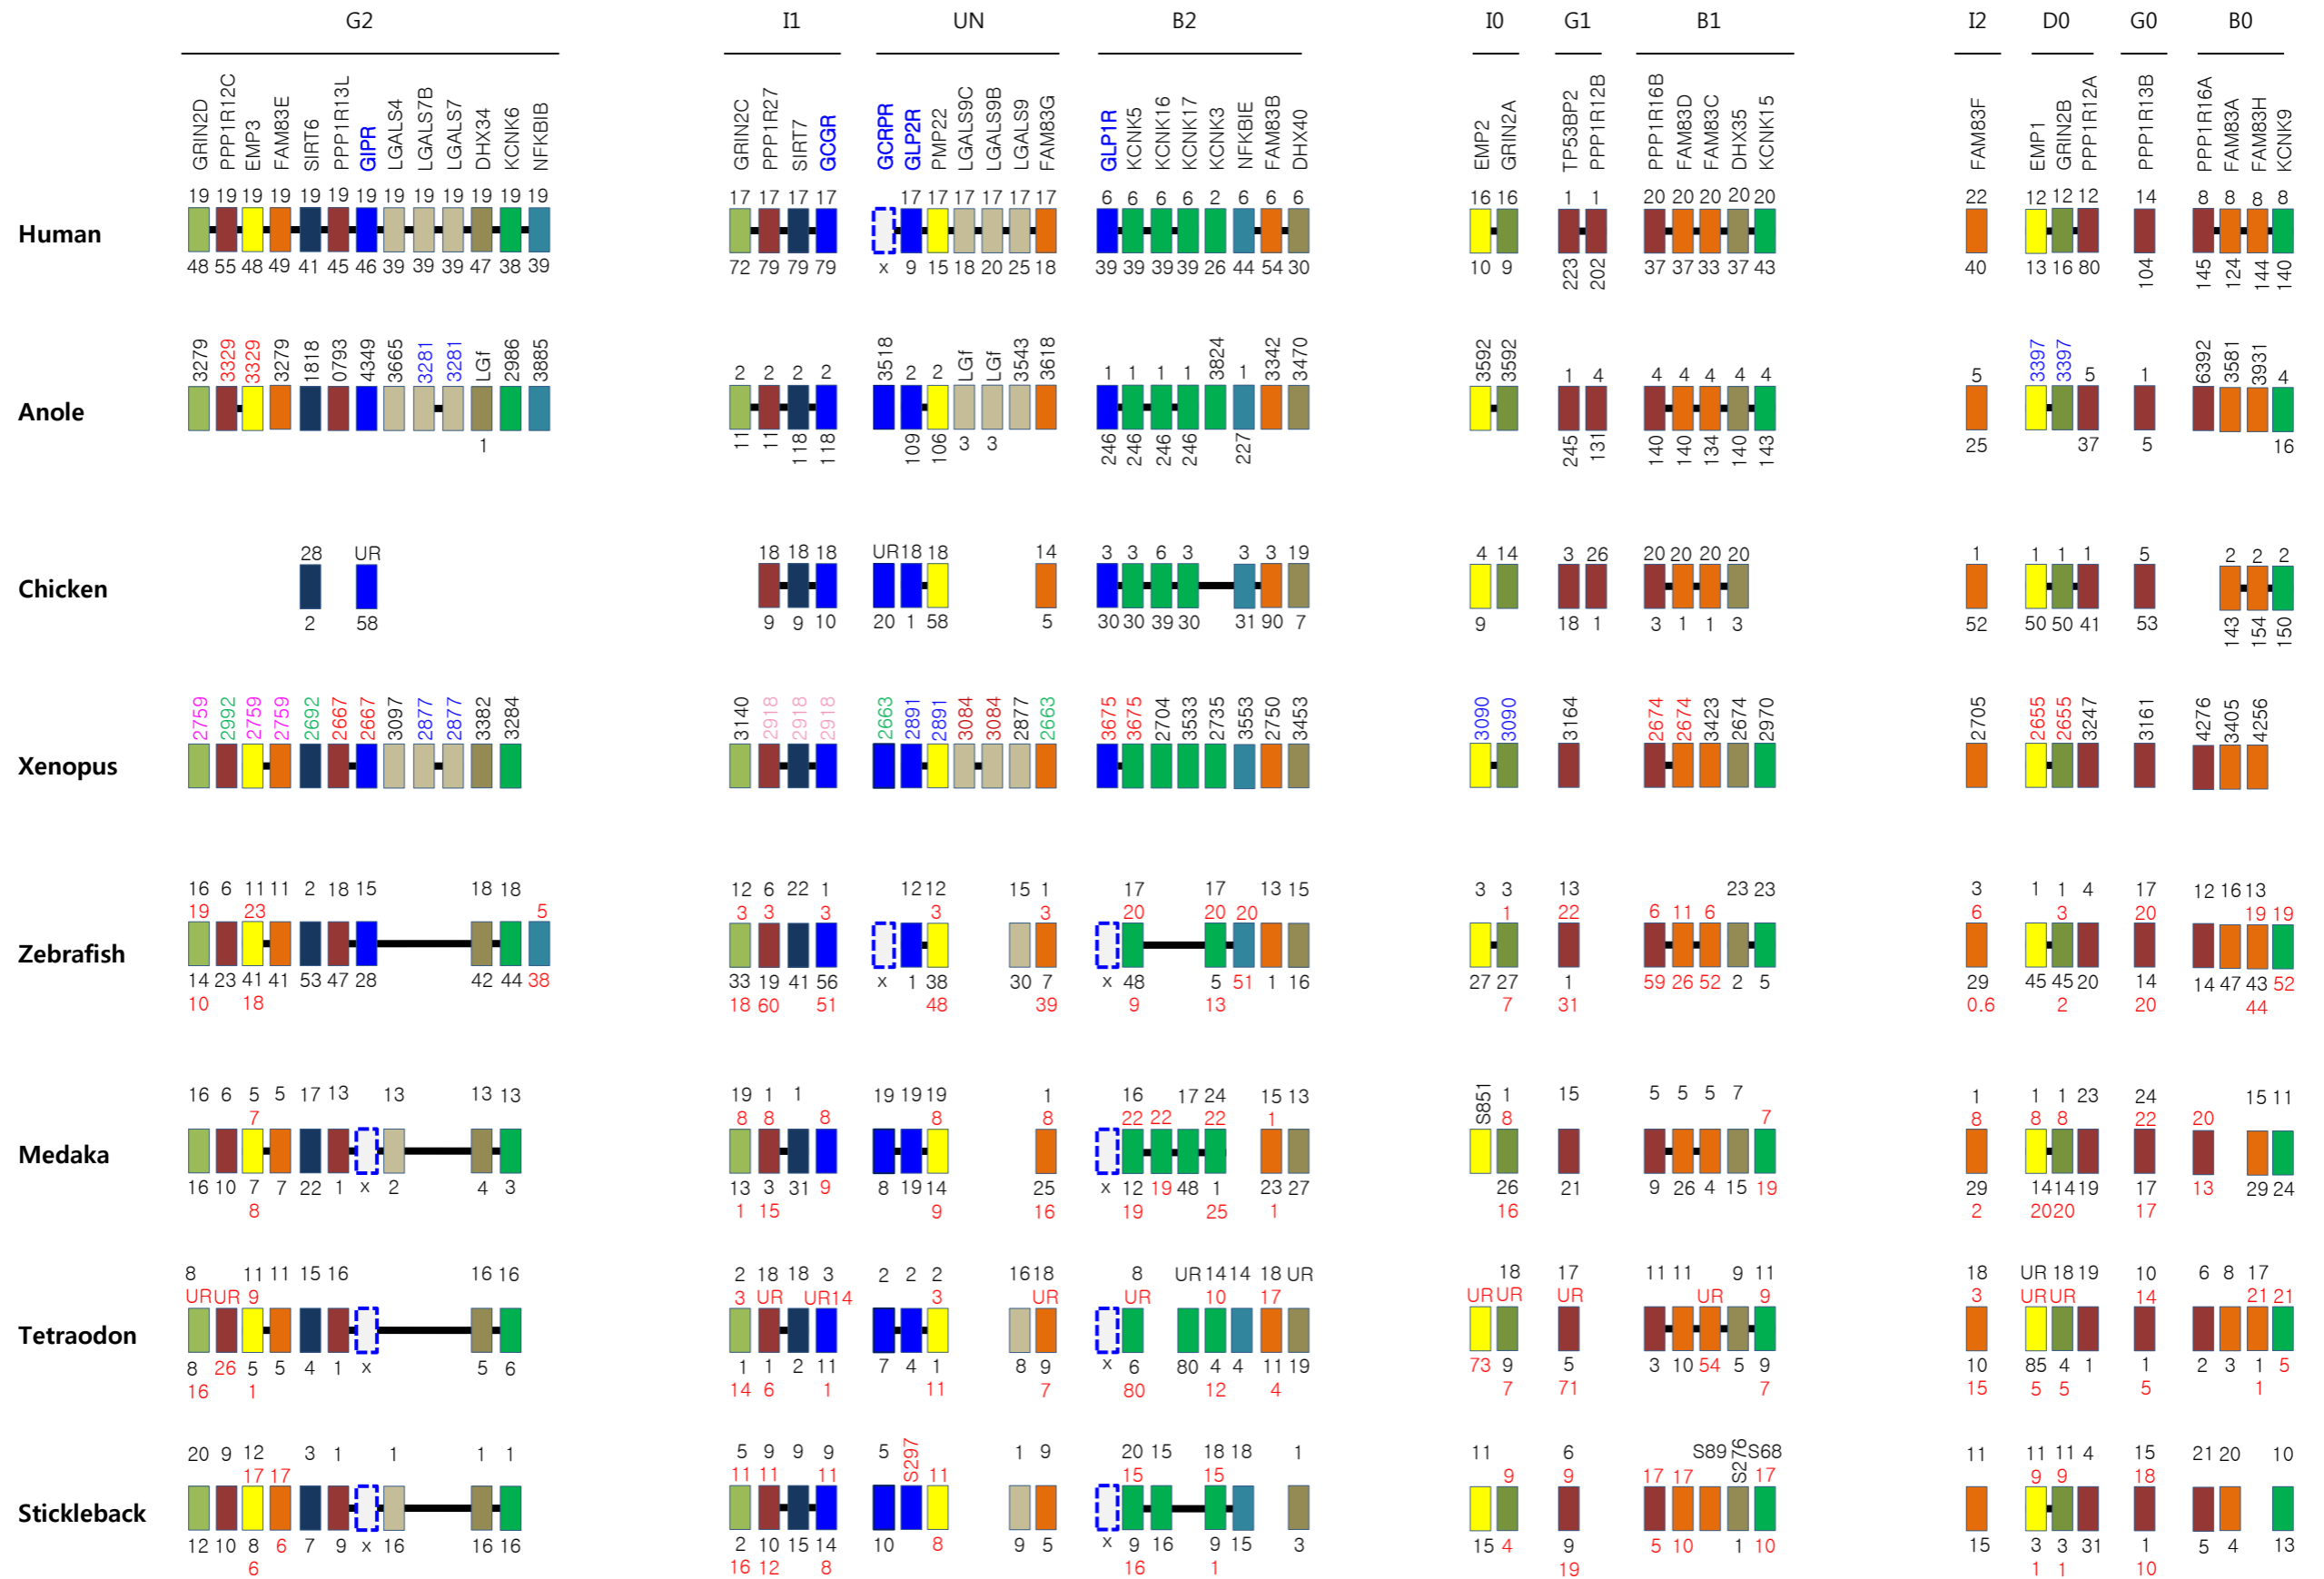

Supplementary Figure S2B

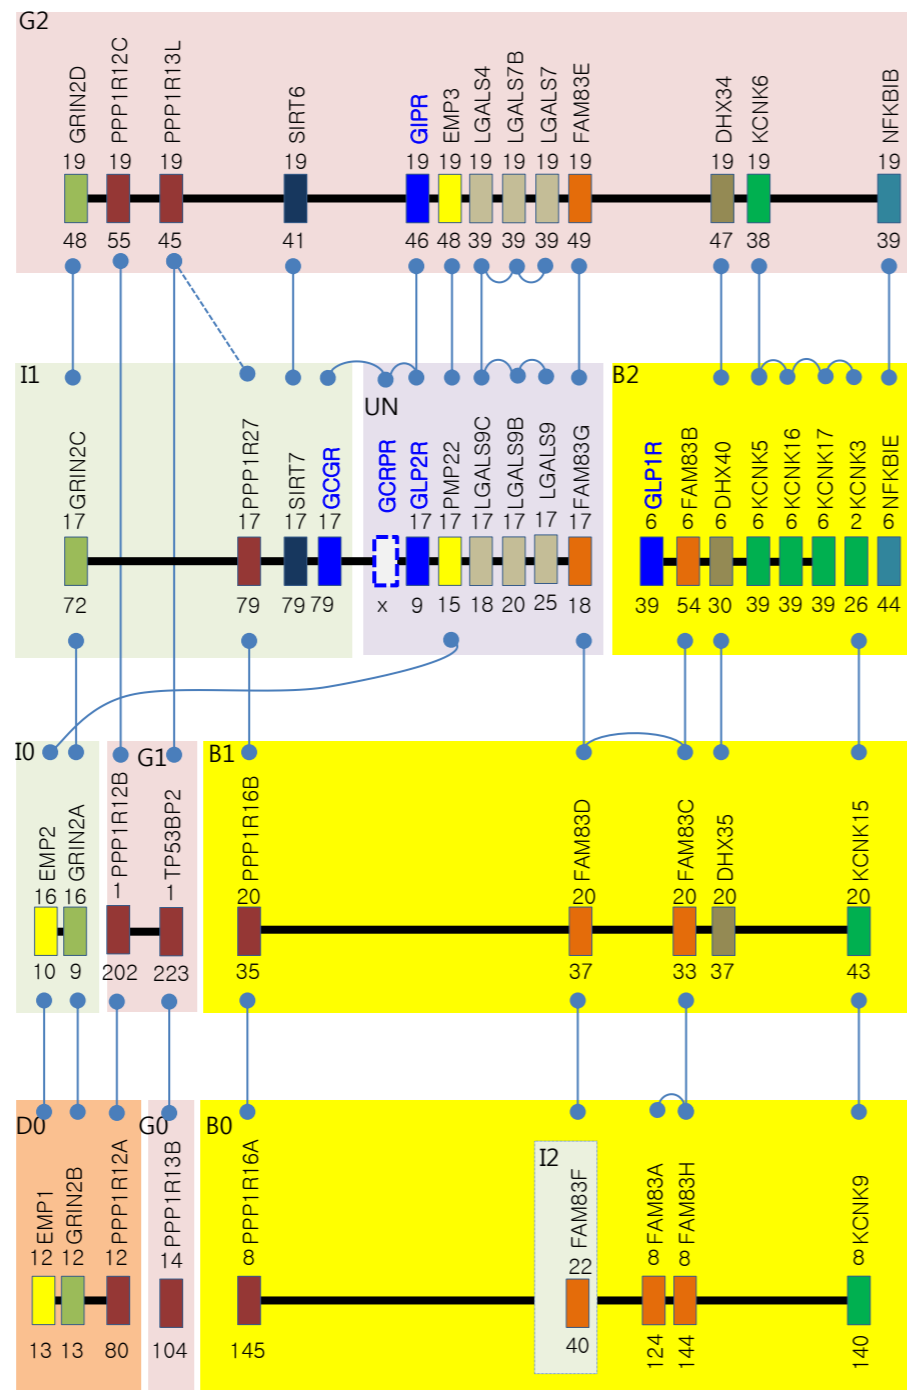

Supplement: pone.0065420.s002.pdf [file pone.0065420.s002.pdf]
